# Supplementary material for: Event-related potential (ERP) correlates of face processing in verbal children with autism spectrum disorders (ASD) and their first-degree relatives: a family study
Source: Springer Nature journal article supplement (doi:10.1186/s13229-018-0220-x), 2018-07-05

A

Topography of P1 amplitude face inversion effect

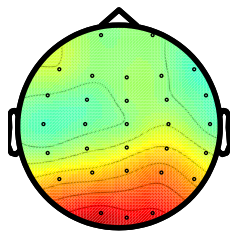

ASD

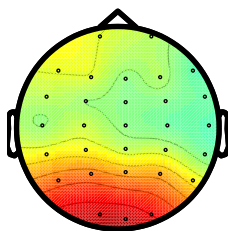

US

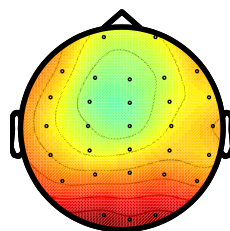

TD

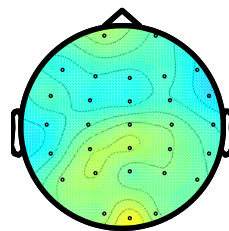

UF

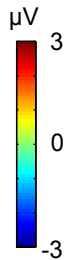

B

Topography of N170 amplitude face inversion effect

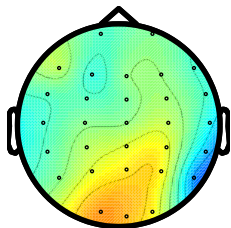

ASD

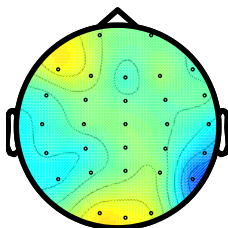

US

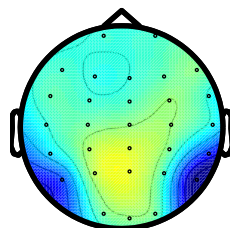

TD

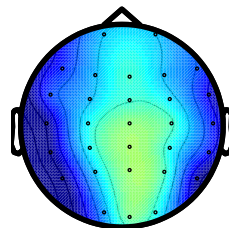

UF

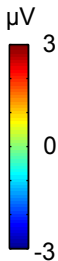

Supplement: MOESM2 [file 15911386]
