# Supplementary material for: Event-related potential (ERP) correlates of face processing in verbal children with autism spectrum disorders (ASD) and their first-degree relatives: a family study
Source: Springer Nature journal article supplement (doi:10.1186/s13229-018-0220-x), 2018-07-05

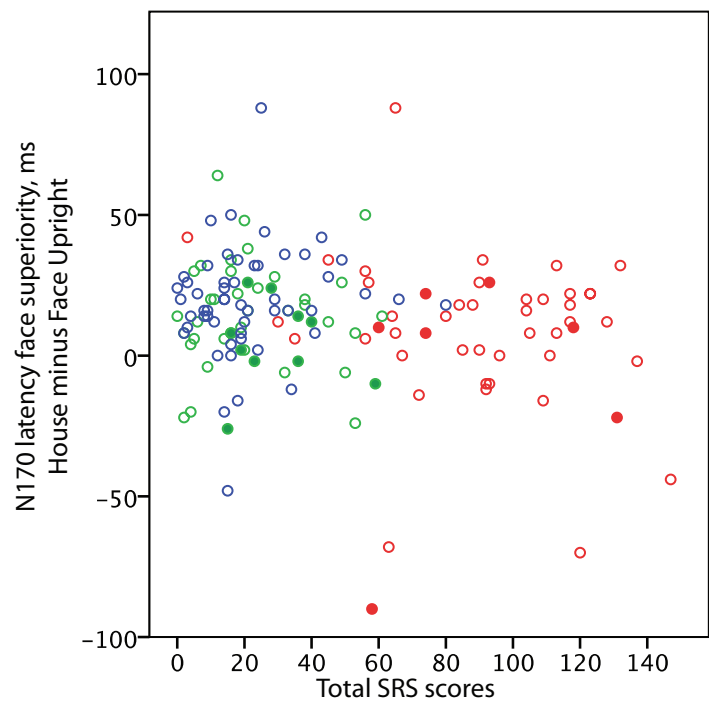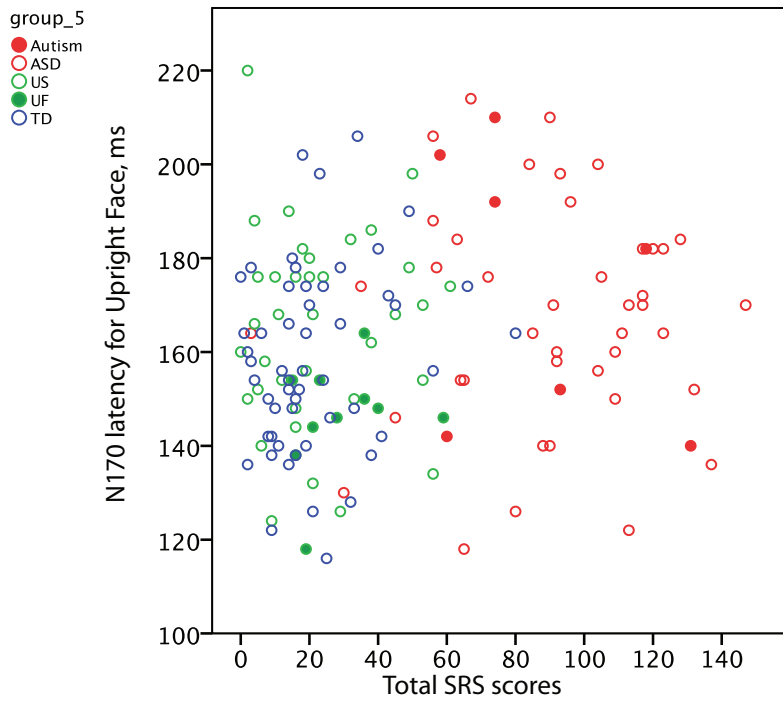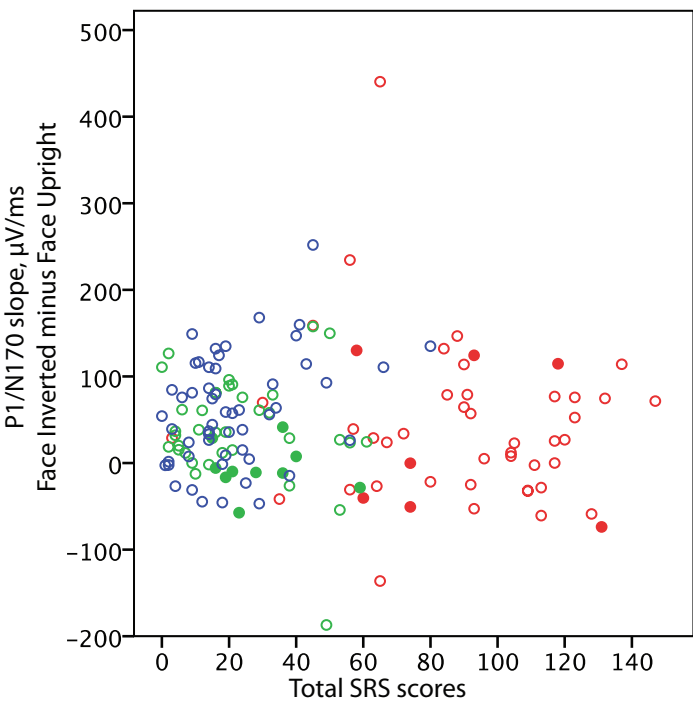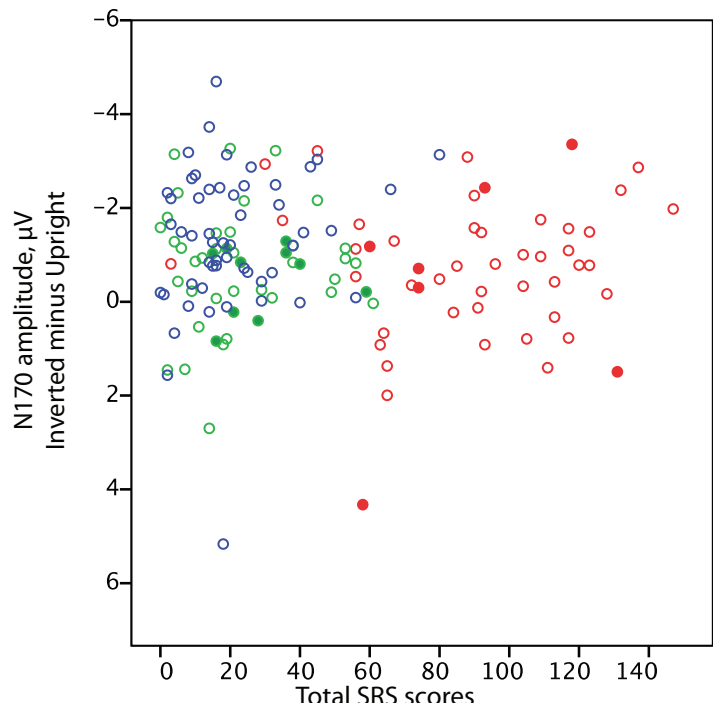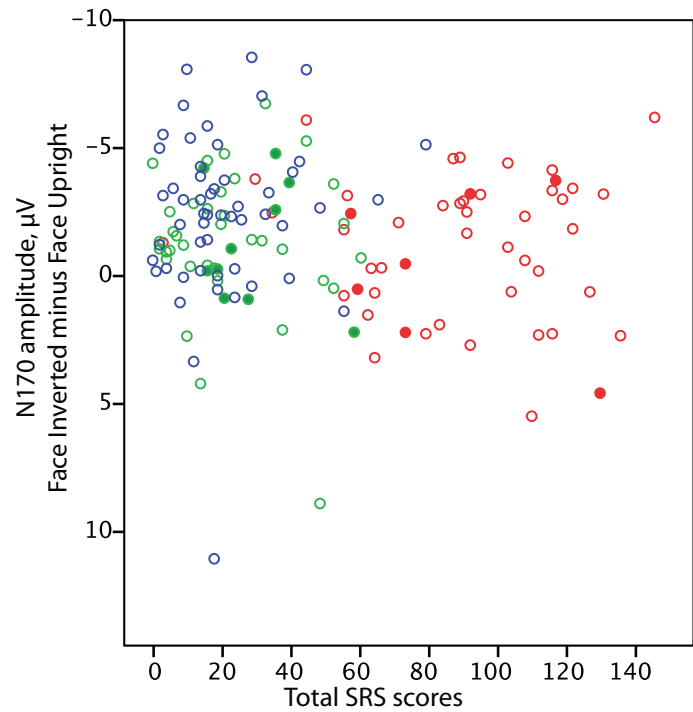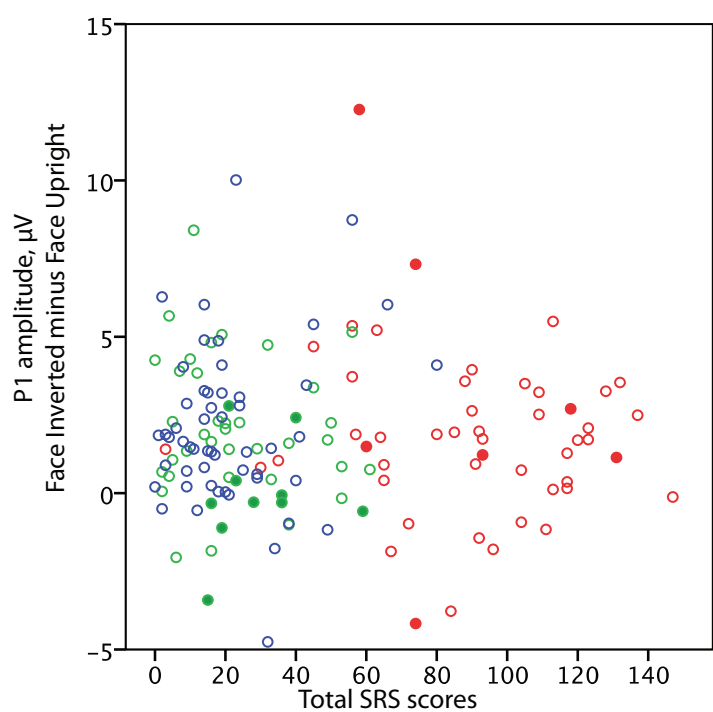

Supplement: MOESM4 [file 15911386]
